# Supplementary material for: Clarification of the Antagonistic Effect of the Lipopeptides Produced by Bacillus amyloliquefaciens BPD1 against Pyricularia oryzae via In Situ MALDI-TOF IMS Analysis
Source: PubMed Central journal article supplement (PMC6273258; doi:10.3390/molecules21121670), 2016-12-03
Supplement: molecules-21-01670-s001.pdf [file molecules-21-01670-s001.pdf]

# Supplementary Materials: Clarification of the Antagonistic Effect of the Lipopeptides Produced by *Bacillus amyloliquefaciens* BPD1 against *Pyricularia oryzae* via In Situ MALDI-TOF IMS Analysis

Jen-Hung Liao, Pi-Yu Chen, Yu-Liang Yang, Shu-Chen Kan, Feng-Chia Hsieh, and Yung-Chang Liu

## 1. Antagonistic Bioassay for Ba-BPD1

### 1.1. Results

#### Antifungal and Antibacterial Activities of Ba-BPD1

Based on the results of antagonistic plate bioassay, Ba-BPD1 can antagonize 21 phytopathogenic fungi (Table S1 and Figure S1) and 12 phytopathogenic bacteria (Table S2). The antifungal and antibacterial spectra of Ba-BPD1 were wide. This indicates that Ba-BPD1 is suitable to be developed as a widely-used biocontrol agent.

**Table S1.** Average inhibition distance between Ba-BPD1 disc and the fungus inoculum.

| Species                                                      | Disease                             | Average Inhibition Distance (mm) |
|--------------------------------------------------------------|-------------------------------------|----------------------------------|
| <i>Botrytis elliptica</i> (Be)                               | lily grey mold                      | 9.2                              |
| <i>Botrytis cinerea</i> (Bc)                                 | rose grey mold                      | 8.8                              |
| <i>Glomerella cingulata</i> (Gc)                             | mango anthracnose                   | 3.1                              |
| <i>Colletotrichum musae</i> (Cm)                             | banana anthracnose                  | 9.8                              |
| <i>Rhizoctonia solani</i> (Rs)                               | sheath blight of rice               | 4.0                              |
| <i>Fusarium oxysporum</i> f. sp. <i>Pisi</i> (F307)          | root rot of pea                     | 10.5                             |
| <i>Fusarium oxysporum</i> f. sp. <i>Lycopersici</i> (F308)   | fruit rot of tomato                 | 5.2                              |
| <i>Fusarium oxysporum</i> f. sp. <i>Lycopersici</i> (Fol-33) | fruit rot of tomato                 | 7.7                              |
| <i>Fusarium solani</i> (FSO)                                 | Fusarium root rot of orchid         | 7.3                              |
| <i>Fusarium solani</i> (FSL)                                 | Fusarium root rot of litchi         | 7.5                              |
| <i>Sclerotium rolfsii</i> Saccardo (Sr)                      | southern blight of lily             | 3.0                              |
| <i>Alternaria mali</i> (Am)                                  | leaf spot of apple                  | 8.0                              |
| <i>Phytophthora capsici</i> (PcS1)                           | Phytophthora blight of sweet pepper | 5.0                              |
| <i>Aspergillus niger</i> (An12)                              | Aspergillus of onion                | 5.0                              |
| <i>Aspergillus niger</i> (An22)                              | Aspergillus of onion                | 4.0                              |
| <i>Penicillium italicum</i> (Pi13)                           | blue mould of citrus                | 13.5                             |
| <i>Penicillium italicum</i> (Pi28)                           | blue mould of citrus                | 12.3                             |
| <i>Colletotrichum gloeosporioides</i> (Cg-T4018)             | anthracnose of sweet persimmon      | 7.8                              |
| <i>Colletotrichum gloeosporioides</i> (Cg-T4044)             | anthracnose of sweet persimmon      | 9.4                              |
| <i>Pestalotiopsis eugeniae</i> (Pe)                          | fruit rot of wax apple              | 7.3                              |
| <i>Botryodiplodia theobromae</i> (Bot)                       | stem end rot of mango               | 9.3                              |

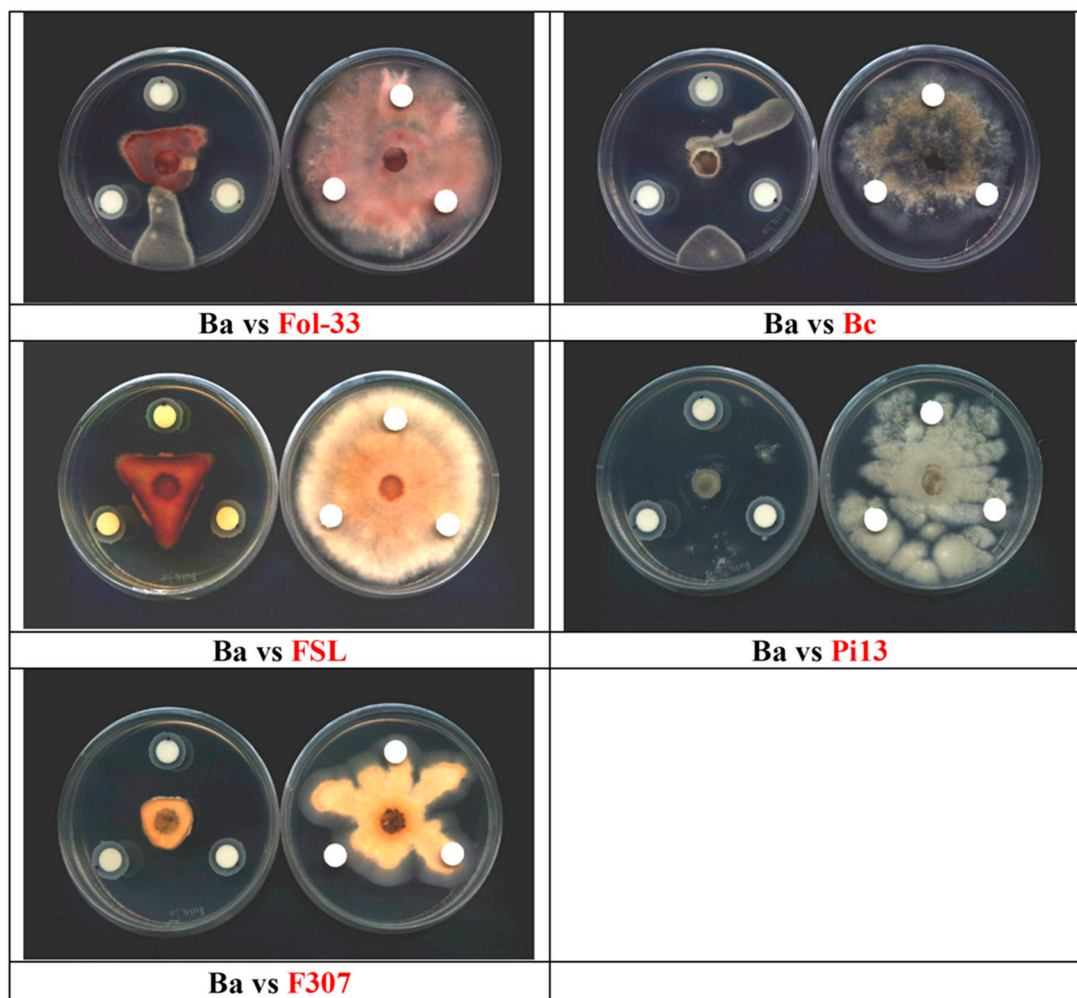

Figure S1. Cont.

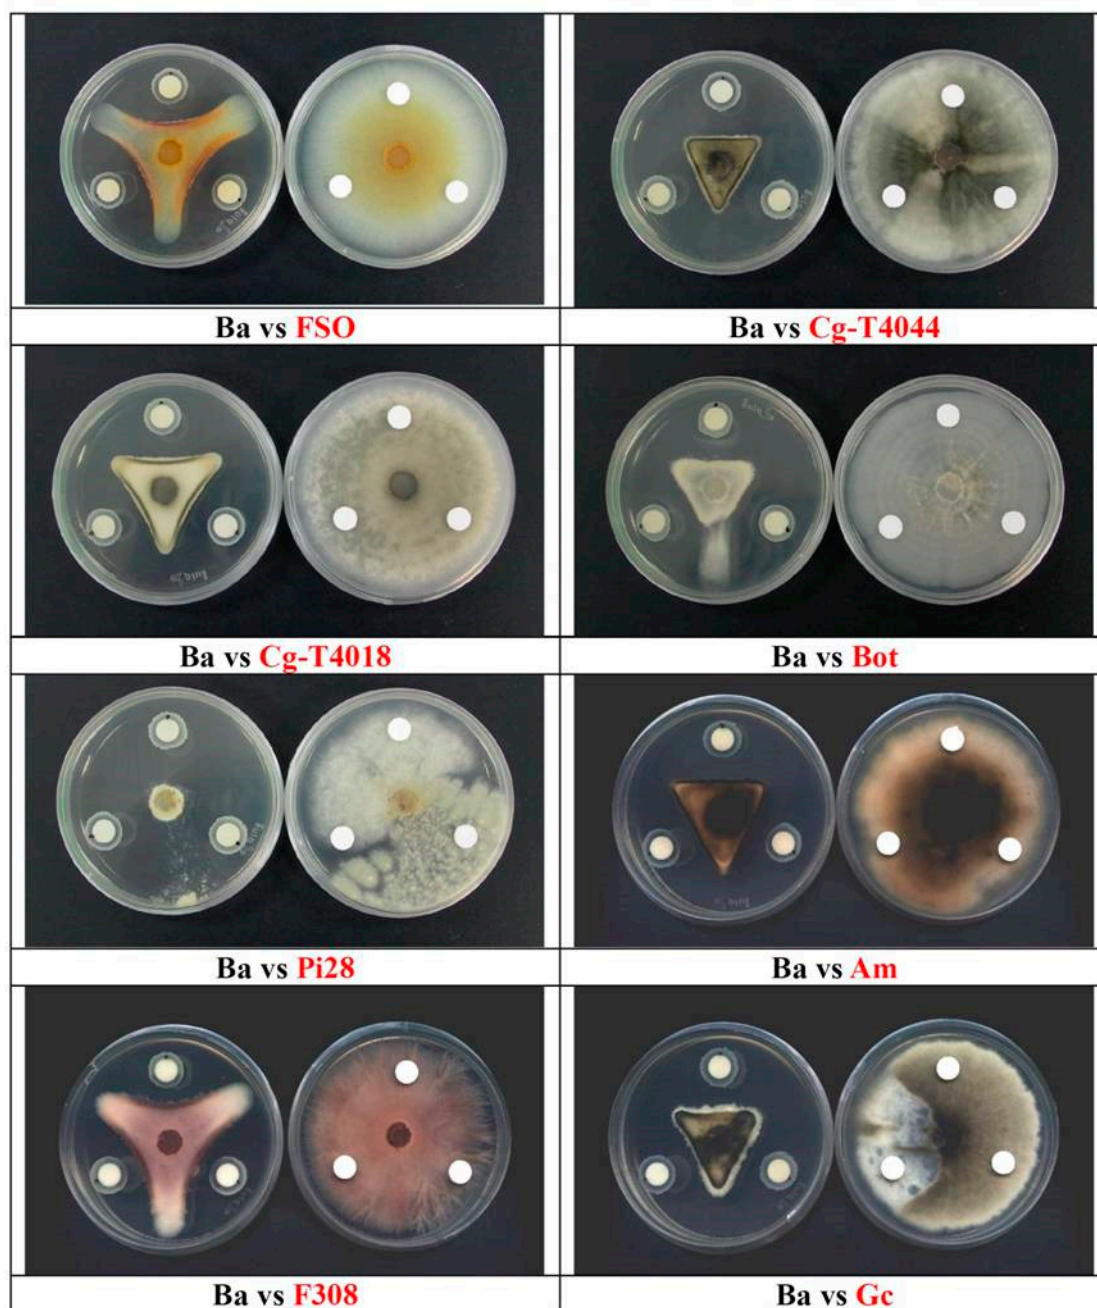

Figure S1. Cont.

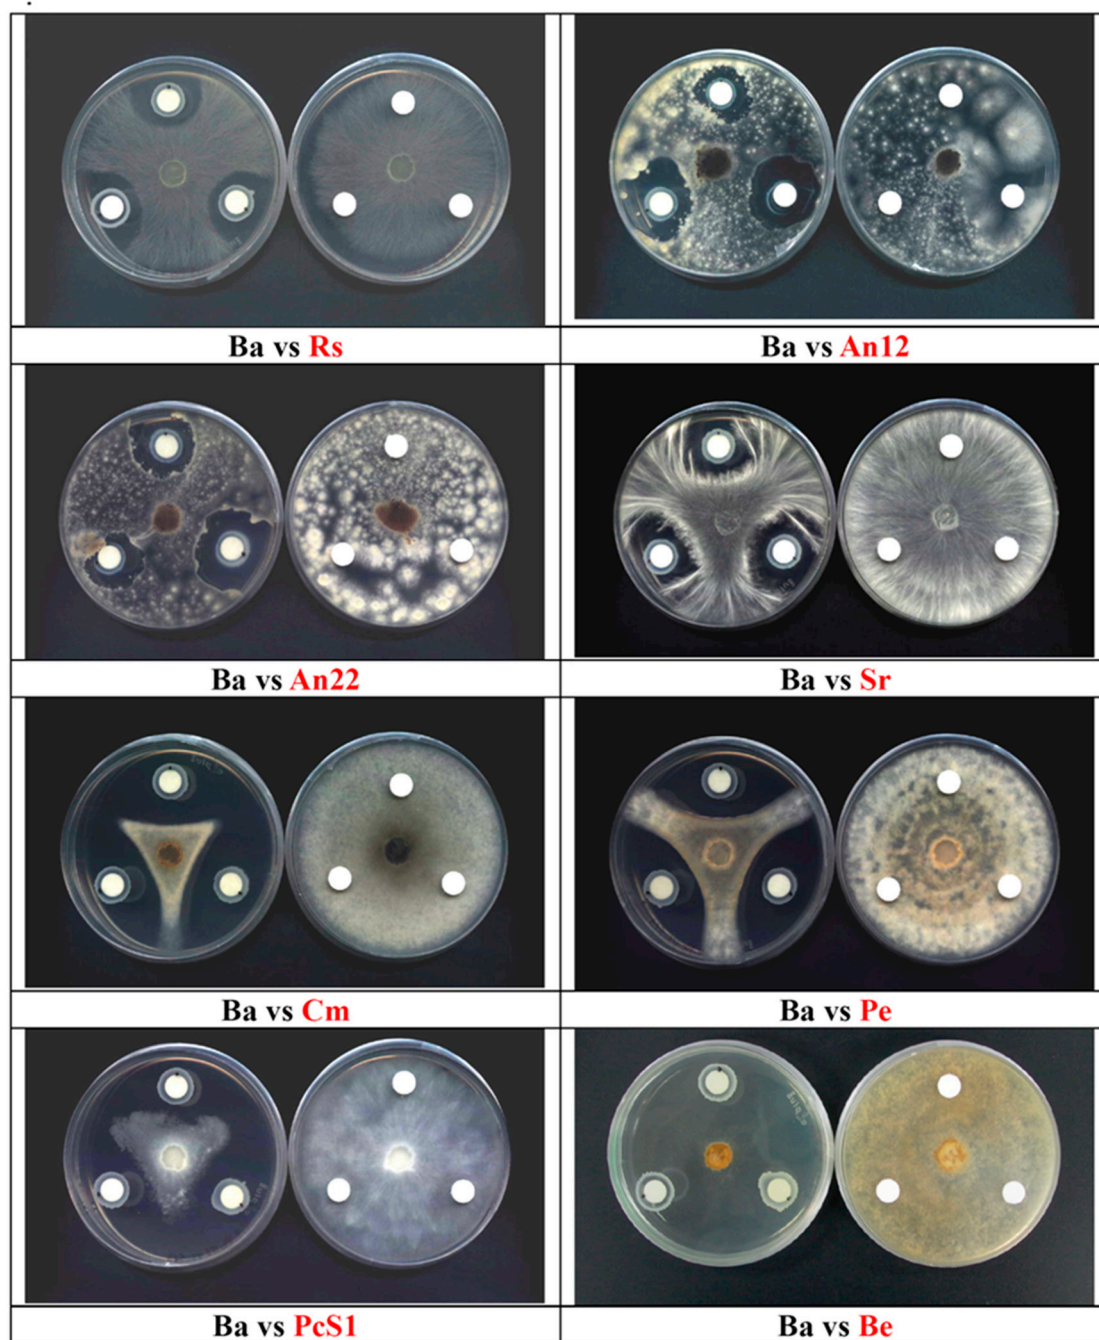

**Figure S1.** Antagonistic bioassay of Ba-BPD1 against phytopathogenic fungi. The short names of the fungi are listed in Table S1.

**Table S2.** The inhibition zone of Ba-BPD1 to the pathogenic bacteria.

| Bacterium                                            | Disease                         | Inhibition Zone in Diameter (cm) |
|------------------------------------------------------|---------------------------------|----------------------------------|
| <i>Acidovorax avenae</i> subsp. <i>citrulli</i>      | Bacterial fruit blotch of melon | 3.4                              |
| <i>Agrobacterium tumefaciens</i>                     | Crown gall                      | 2.3                              |
| <i>Burholderia caryophylli</i>                       | Bacterial wilting               | 3.5                              |
| <i>Enterobacter cloacae</i>                          | Bacterial basal rot             | 2.5                              |
| <i>Erwinia carotovora</i> subsp. <i>carotovora</i>   | Soft rot disease                | 2.3                              |
| <i>Erwinia chrysanthemi</i>                          | Soft rot disease                | 3.1                              |
| <i>Pseudomonas syringae</i>                          | Bacterial leaf spots            | 3.1                              |
| <i>Ralstonia solanacearum</i>                        | Bacterial wilting               | 2.9                              |
| <i>Xanthomonas axonopodis</i> pv. <i>cirti</i>       | Citrus canker                   | 4.5                              |
| <i>Xanthomonas axonopodis</i> pv. <i>vesicatoria</i> | Bacterial spot of tomato        | 4.5                              |
| <i>Xanthomonas compestris</i> pv. <i>compestris</i>  | Black rot of brassica           | 4.5                              |
| <i>Xanthomonas oryzae</i> pv. <i>Oryzae</i>          | Bacterial leaf blight           | 3.2                              |

## 1.2. Materials and Methods

### 1.2.1. Antagonistic Bioassay with Phytopathogenic Fungi

The antifungal activity of Ba-BPD1 towards 21 phytopathogenic fungi was tested on PDA plates. A plug (about 1 cm in diameter) of each phytopathogenic fungus cut from the leading edge of the cultured plate (grown on PDA at 25 °C for five days) was placed in the center of the antagonistic plate. Simultaneously, three paper discs with 9 mm diameter were placed at a distance of 1.8 cm from the fungi inoculum. Then 30 µL of Ba-BPD1 cultured broth were loaded on each paper disc. The plates were incubated at 25 °C until the fungi in untreated contrast covered the plate. The distance of the inhibition zone was measured.

### 1.2.2. Antagonistic Bioassay with Phytopathogenic Bacteria

The antibacterial activity of Ba-BPD1 towards 12 phytopathogenic bacteria was tested on LA plates. A paper disc with 9 mm diameter was placed at the center of plate, and 30 µL of Ba-BPD1 cultured broth (grown in LB at 30 °C overnight) was loaded on paper disc. Then the phytopathogenic bacteria-cultured broth (grown in LB at 30 °C overnight) was sprayed evenly on the LA plate. The plates were incubated at 30 °C till the inhibition zone appeared. The diameter of the inhibition zone was measured.
